# Supplementary material for: A workflow for the joint modeling of longitudinal and event data in the development of therapeutics: Tools, statistical methods, and diagnostics
Source: PubMed Central journal article supplement — CPT Pharmacometrics Syst Pharmacol. 2022 Feb 21;11(4):425–37. doi: 10.1002/psp4.12763 (PMC9007602; doi:10.1002/psp4.12763), 2022-02-21
Supplement: PSP4-11-425-s006.pdf [file PSP4-11-425-s006.pdf]

|                                                                                                         | Qualification                                |                                                       | Validation                                            |                                                   |
|---------------------------------------------------------------------------------------------------------|----------------------------------------------|-------------------------------------------------------|-------------------------------------------------------|---------------------------------------------------|
| Data Preparation                                                                                        | Model Building                               | Graphical Diagnostics                                 | Survival Discrimination                               | Graphical Diagnostics                             |
| <i>JM/JMbayes</i><br>& Monolix<br>training and<br>validation<br>dataset<br>preparation<br>(Section 1.3) | <i>JM/JMbayes</i><br>models<br>(Section 2.1) | <i>JM/JMbayes</i><br>goodness-of-fit<br>(Section 3.2) | <i>JM/JMbayes</i><br>ROC-AUC &<br>BS<br>(Section 4.2) | <i>JM/JMbayes</i><br>predictions<br>(Section 5.2) |
|                                                                                                         | Monolix<br>models<br>(Section 2.2)           | Monolix<br>goodness-of-fit<br>(Section 3.1)           | Monolix<br>ROC-AUC &<br>BS<br>(Section 4.1)           | Monolix<br>predictions<br>(Section 5.1)           |
