# Supplementary figures and images for: A workflow for the joint modeling of longitudinal and event data in the development of therapeutics: Tools, statistical methods, and diagnostics
Source: PubMed Central journal article supplement — CPT Pharmacometrics Syst Pharmacol. 2022 Feb 21;11(4):425–37. doi: 10.1002/psp4.12763 (PMC9007602; doi:10.1002/psp4.12763), 2022-02-21

Univariate SLD

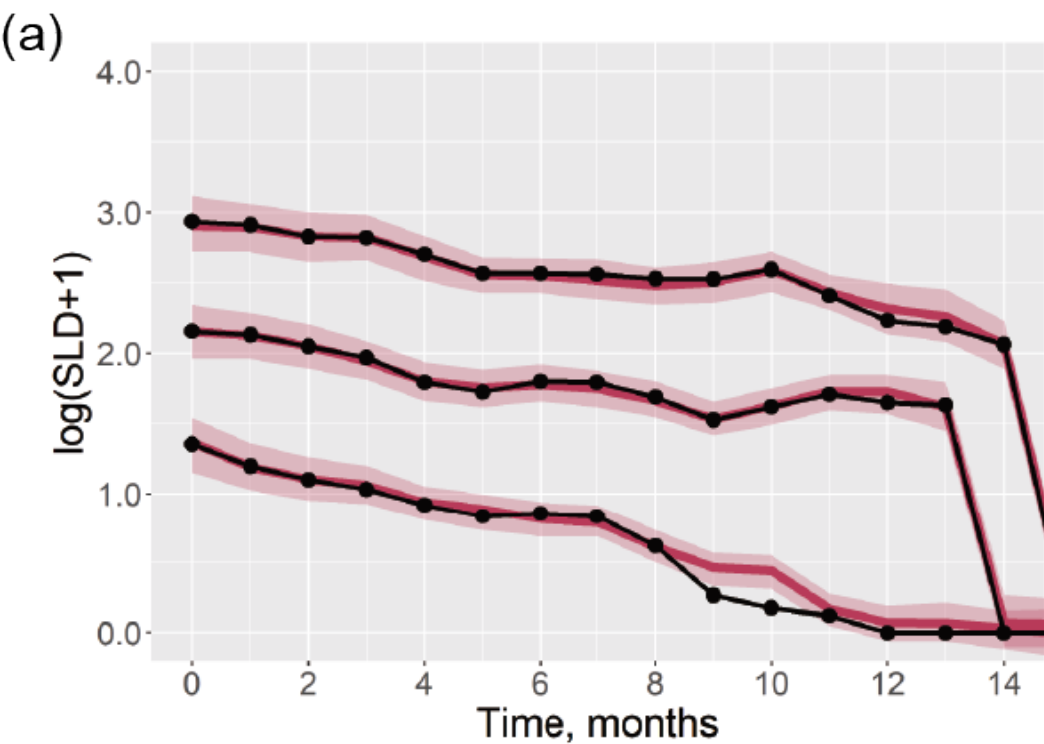

Univariate LDH

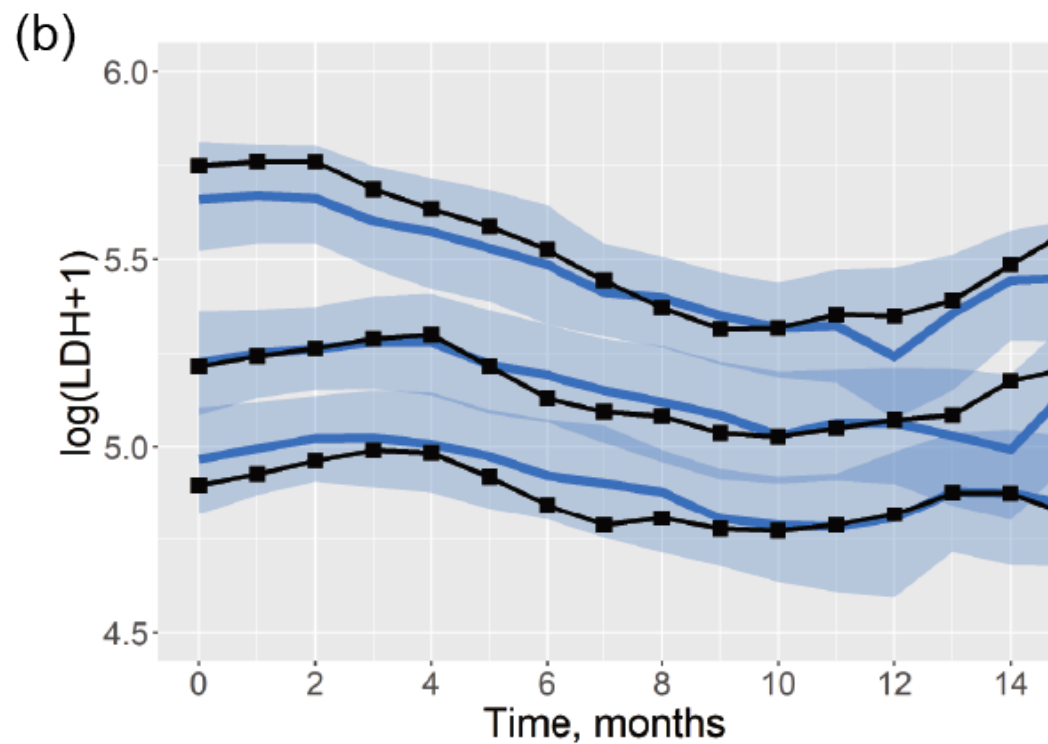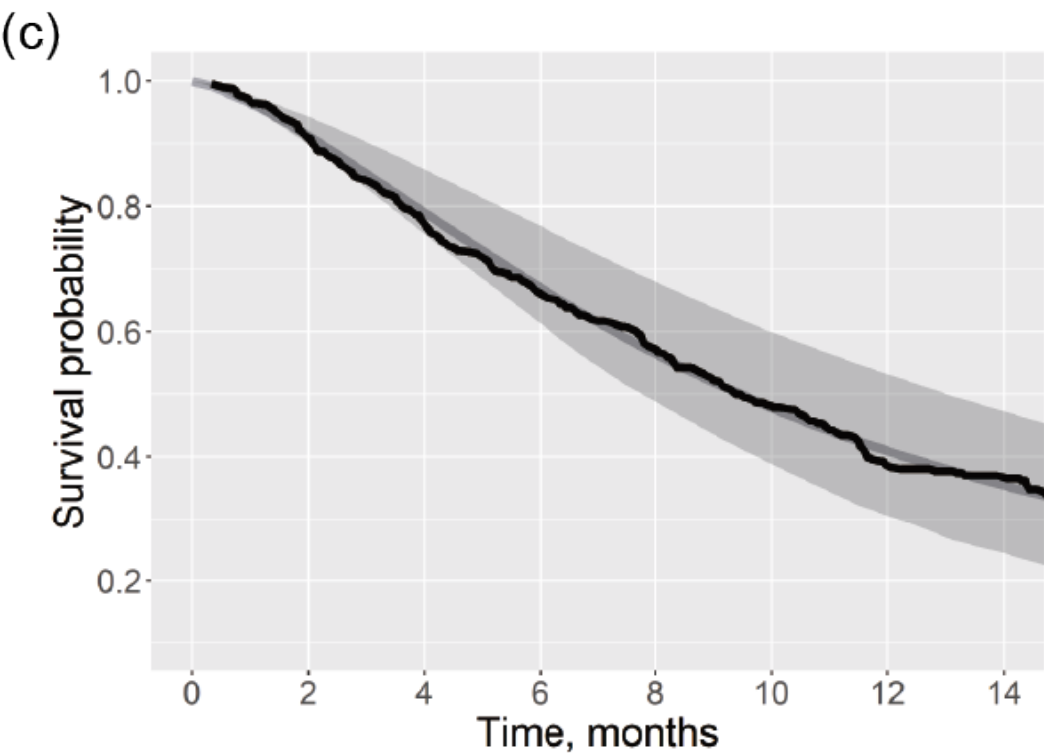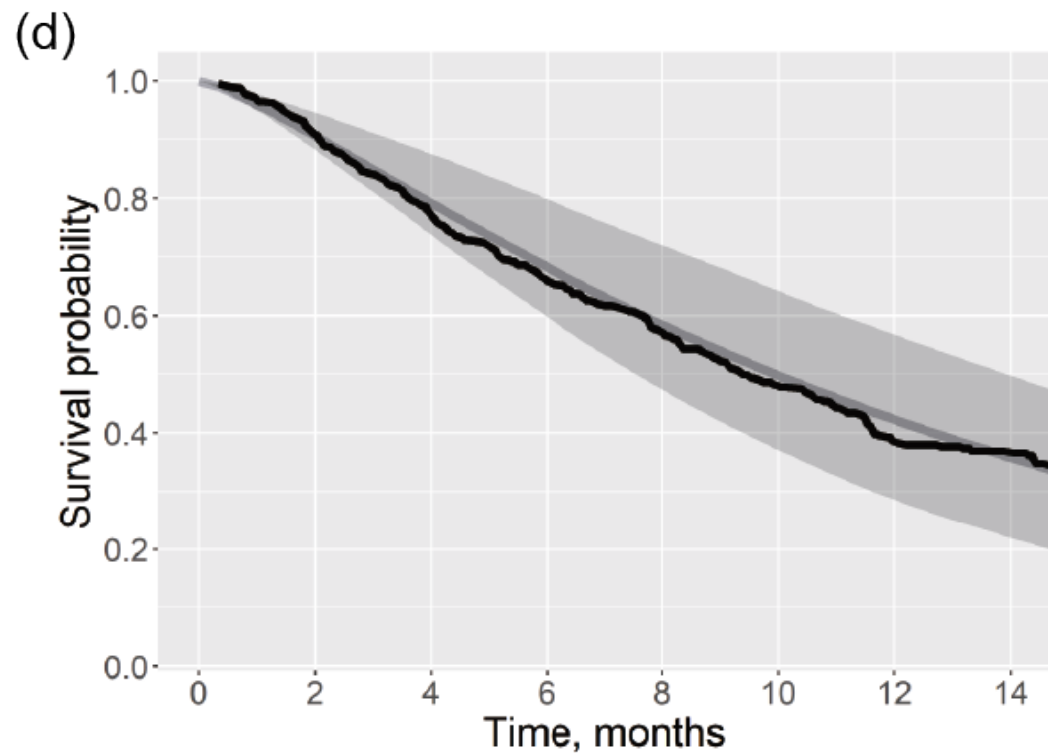

Supplement: PSP4-11-425-s002.pdf [file PSP4-11-425-s002.pdf]
